# Supplementary material for: Agroforestry Ecosystem Structure and the Stability Improvement Strategy in Control of Karst Desertification
Source: MDPI journal article supplement (doi:10.3390/f14040845), 2023-04-20
Supplement: s1 [file s1]

# Supplementary Materials:

**Table S1.** Geographical information of AFS sample sites.

| Study Area                          | Sample No. | Latitude (N) | Longitude (E) | Altitude (m) | Slope direction (°) | Slope (°) | Slope position | Type of landform | Soil type         |
|-------------------------------------|------------|--------------|---------------|--------------|---------------------|-----------|----------------|------------------|-------------------|
| <b>Homegardens (HG)</b>             | CF-①       | 27°15'08.95" | 105°5'29.28"  | 1833         | 70E                 | 7         | Mid-slope      | Policy           | Yellow Loam       |
|                                     | CF-②       | 27°24'51.90" | 105°5'48.48"  | 1829         | 102E                | 9         | Downslope      | Policy           | yellow-brown soil |
|                                     | CF-③       | 27°14'50.13" | 105°5'53.04"  | 1843         | 113W                | 25        | Mid-slope      | Mountain         | Yellow Loam       |
|                                     | CF-④       | 27°24'68.00" | 105°10'63.00" | 1882         | 163ES               | 15        | Downslope      | Policy           | Yellow Loam       |
|                                     | CF-⑤       | 27°24'68.57" | 105°10'21.88" | 1881         | 178S                | 13        | Downslope      | Mountain         | Yellow Loam       |
|                                     | CF-⑥       | 27°14'16.13" | 105°5'23.34"  | 1690         | 124S                | 6         | Flatland       | Depression       | yellow-brown soil |
|                                     | CF-⑦       | 27°14'05.21" | 105°5'32.03"  | 1740         | 182S                | 9         | Flatland       | Depression       | yellow-brown soil |
|                                     | CF-⑧       | 27°14'44.35" | 105°5'47.57"  | 1810         | 146S                | 10        | Flatland       | Depression       | yellow-brown soil |
|                                     | CF-⑨       | 27°15'14.40" | 105°5'51.26"  | 1896         | 6N                  | 8         | Flatland       | Depression       | Yellow Loam       |
| <b>Agrisilviculture (ASV)</b>       | HJ-①       | 25°40'15.90" | 105°40'00.24" | 598          | 148S                | 45        | Mid-slope      | Mid-slope        | Limestone         |
|                                     | HJ-②       | 25°40'26.36" | 105°39'59.53" | 613          | 153S                | 37        | Mid-slope      | Mid-slope        | Limestone         |
|                                     | HJ-③       | 25°40'24.64" | 105°40'0.19"  | 580          | 220S                | 35        | Mid-slope      | Mid-slope        | Limestone         |
|                                     | HJ-④       | 25°40'25.78" | 105°39'55.21" | 568          | 237S                | 45        | Mid-slope      | Mid-slope        | Limestone         |
|                                     | HJ-⑤       | 25°39'33.32" | 105°38'34.21" | 783          | 110E                | 25        | Mid-slope      | Mid-slope        | Limestone         |
|                                     | HJ-⑥       | 25°39'31.97" | 105°38'31.37" | 800          | 101E                | 27        | Mid-slope      | Mid-slope        | Limestone         |
|                                     | HJ-⑦       | 25°39'30.61" | 105°38'31.04" | 747          | 6N                  | 20        | Downslope      | Depression       | Limestone         |
|                                     | HJ-⑧       | 25°39'00.43" | 105°38'13.57" | 891          | 73E                 | 13        | Flatland       | Depression       | Limestone         |
|                                     | HJ-⑨       | 25°41'32.11" | 105°38'34.21" | 936          | 47S                 | 17        | Flatland       | Depression       | Limestone         |
| <b>Multipurpose woodlots (MWLs)</b> | SB-①       | 27°8'57.47"  | 108°7'35.04"  | 1031         | 325W N              | 34        | Mid-slope      | Mid-slope        | Yellow Loam       |
|                                     | SB-②       | 27°8'56.47"  | 108°6'58.12"  | 1012         | 153S                | 20        | Downslope      | Mid-slope        | Yellow Loam       |
|                                     | SB-③       | 27°12'56.53" | 108°1'32.03"  | 981          | 220S                | 20        | Downslope      | Mid-slope        | yellow-brown soil |

|      |                  |                  |      |       |    |           |            |             |
|------|------------------|------------------|------|-------|----|-----------|------------|-------------|
| SB-④ | 27°13'6.38<br>"  | 108°1'37.77<br>" | 1132 | 237S  | 47 | Mid-slope | Mid-slope  | Limestone   |
| SB-⑤ | 27°9'00.40<br>"  | 108°9'00.26<br>" | 1036 | 110E  | 34 | Mid-slope | Mid-slope  | Limestone   |
| SB-⑥ | 27°9'00.31<br>"  | 108°9'00.25<br>" | 897  | 213WS | 35 | Mid-slope | Mid-slope  | Limestone   |
| SB-⑦ | 27°<br>9'31.34"  | 108°9'00.25<br>" | 1014 | 136W  | 17 | Downslope | Depression | Limestone   |
| SB-⑧ | 27°54'25.4<br>3" | 108°9'50.81<br>" | 1154 | 116E  | 20 | Downslope | Depression | Yellow Loam |
| SB-⑨ | 27°9'26.49<br>"  | 108°7'47.54<br>" | 1197 | 23N   | 13 | Flatland  | Depression | Limestone   |

**Table S2.** Principles and description of the construction of the index system.

| Follow the principles        | Description                                                                                                                                                                                                                                                                                                                                                                                                                                                  |
|------------------------------|--------------------------------------------------------------------------------------------------------------------------------------------------------------------------------------------------------------------------------------------------------------------------------------------------------------------------------------------------------------------------------------------------------------------------------------------------------------|
| Scientific principle         | It is necessary to understand the essential characteristics of AFS and the basic characteristics of the KD ecosystem. A deep understanding of the primary connotation of stability is necessary to comprehensively, systematically, and accurately reflect the connotation characteristics of stability in the index system. To reveal the internal relationships of karst KD AFS and the reflections brought about when subjected to external disturbances. |
| Sustainability Principles    | The KD-AFS responds to the system's stability through a continuous dynamic process of artificial sowing, planting, cultivation, management, and care until harvesting, which requires the selection of indicators to be based on the present while considering future sustainable use.                                                                                                                                                                       |
| Representativeness Principle | The construction of the AFS Stability evaluation index system involves a wide range of available indicators, which requires the selection of representative leading indicators. At the same time can reflect the unique environmental characteristics of KD areas.                                                                                                                                                                                           |
| Feasibility principle        | The principle focuses on the operability of the actual monitoring indicators, which contains the difficulty of obtaining and the accuracy of measurement. Due to the limited existing technical means, the difficulty of obtaining accurate monitoring and assessment indicators varies greatly. We should not focus only on the objectivity of the indicator system at the expense of operability and should combine quantitative and qualitative.          |
| Comprehensive Principle      | The AFS in the KD is a natural-economic-social composite ecosystem formed by interacting with the natural environment and human society. Therefore, the selection of indicators requires careful consideration of the various impacts of natural and human factors on the internal and external ecosystem                                                                                                                                                    |

**Table S3.** Stability evaluation index screening criteria and meaning.

| Selection criteria                        | Meaning                                                                                                                                          |
|-------------------------------------------|--------------------------------------------------------------------------------------------------------------------------------------------------|
| Logical clarity                           | Organize indicators according to logical relationships within ecosystem stability.                                                               |
| Related to management objectives          | Indicators provide indicative and precise information concerning management objectives to serve ecosystem conservation and management decisions. |
| related to KD domain-specific environment | Indicators are used to assess the AFS Stability in KAD and can cover the natural and social issues associated with it.                           |

|                             |                                                                                                                                                                        |
|-----------------------------|------------------------------------------------------------------------------------------------------------------------------------------------------------------------|
| Representation              | The number of indicators need not be excessive but should reveal the critical issues in the AFS Stability assessment.                                                  |
| Method refinement           | The clear and scientific definition of indicators, scientific evaluation methods, reliable data collection methods, and ease for long-term and continuous measurement. |
| Integrity and flexibility   | The indicator system is stable and can meet the needs of different users to the maximum extent.                                                                        |
| Applicability and diffusion | Easy to understand and grasp, the evaluation results are not only grasped by the researcher but also easily understood and recognized by the manager.                  |

**Table S4.** AFS Stability evaluation indicators and their ecological significance .

| Target layer  | Guideline layer           | Level 1 Indicators                    | Secondary indicators                 | Nature of Indicator | Ecological significance                     |
|---------------|---------------------------|---------------------------------------|--------------------------------------|---------------------|---------------------------------------------|
| AFS Stability | Structural indicators (U) | Stand structure (U <sub>1</sub> )     | Angular scale(U <sub>11</sub> )      | Reverse             | Forest distribution pattern                 |
|               |                           |                                       | Mixing degree(U <sub>12</sub> )      | Positive            | Degree of spatial isolation of forest trees |
|               |                           |                                       | Size ratio(U <sub>13</sub> )         | Positive            | Extent of stand size differentiation        |
|               |                           |                                       | Depression(U <sub>14</sub> )         | Reverse             | Reflects stand density                      |
|               |                           | Species diversity (U <sub>2</sub> )   | Tree height(U <sub>15</sub> )        | Positive            | Forest growth status                        |
|               |                           |                                       | Crown size(U <sub>16</sub> )         | Positive            | Forest growth status                        |
|               |                           |                                       | Margalef Richness(U <sub>21</sub> )  | Positive            | Species $\alpha$ diversity characteristics  |
|               |                           |                                       | Shannon Diversity(U <sub>22</sub> )  | Positive            | Species $\alpha$ diversity characteristics  |
|               |                           |                                       | Pielou Uniformity(U <sub>23</sub> )  | Positive            | Species $\alpha$ diversity characteristics  |
|               |                           |                                       | Simpson dominance(U <sub>24</sub> )  | Positive            | Species $\alpha$ diversity characteristics  |
|               |                           | Soil fertility (U <sub>3</sub> )      | SOM(U <sub>31</sub> )                | Positive            | Soil fertility status                       |
|               |                           |                                       | TN(U <sub>32</sub> )                 | Positive            | Soil fertility status                       |
|               |                           |                                       | TP(U <sub>33</sub> )                 | Positive            | Soil fertility status                       |
|               |                           |                                       | TK(U <sub>34</sub> )                 | Positive            | Soil fertility status                       |
|               | Site Environment (U)      | Soil fertility (U <sub>3</sub> )      | SBD (U <sub>35</sub> )               | Positive            | Soil fertility status                       |
|               |                           |                                       | WFPS(U <sub>36</sub> )               | Positive            | Soil structural characteristics             |
|               |                           | Topographic factors (U <sub>4</sub> ) | Soil pH(U <sub>37</sub> )            | Reverse             | Soil structural characteristics             |
|               |                           |                                       | Falling gradient(U <sub>41</sub> )   | Reverse             | Terrain and landform conditions             |
|               |                           |                                       | Height(U <sub>42</sub> )             | Reverse             | Terrain and landform conditions             |
|               |                           |                                       | Rock Exposure Rate(U <sub>43</sub> ) | Reverse             | Terrain and landform conditions             |

**Table S5.** Evaluation Indicators.

| Area. | Agroforestry type | Angular scale | Mixing degree | Size ratio | Depression | Tree height | Crown size | Uniformity index | Strength Index | Richness Index | Diversity Index | SOM                                                      | TN                       | TP                               | TK          | SBD         | WFPS        | Soil pH     | Falling gradient | Height(m) |
|-------|-------------------|---------------|---------------|------------|------------|-------------|------------|------------------|----------------|----------------|-----------------|----------------------------------------------------------|--------------------------|----------------------------------|-------------|-------------|-------------|-------------|------------------|-----------|
| BJ    | HG                | 0.516667      | 0.5           | 0.233333   | 0.603333   | 4.208       | 2.9395     | 3.479406         | 2.398306       | 0.828148       | 0.133768        | 3.3828450.2364060.6932435.664033                         | 1.23                     | 53.423338.666667                 | 1825.666667 | 6.83        |             |             |                  |           |
|       | ASV               | 0.5           | 0.533333      | 0.3        | 0.229      | 3.900952    | 2.920548   | 2.808085         | 2.171033       | 0.767159       | 0.163411        | 3.45789                                                  | 0.2534050.68947117.93379 | 1.23                             | 53.31667    | 14          | 1857        |             |                  |           |
|       | MWLS              | 0.566667      | 0.6           | 0.283333   | 0.6        | 3.295741    | 2.882167   | 2.532238         | 1.925686       | 0.759135       | 0.23903         | 4.166633                                                 | 0.32371                  | 0.7324187.0488561.40666747.50667 | 0           | 1731.333333 | 6.626666667 |             |                  |           |
| HJ    | HG                | 0.533333      | 0.583333      | 0.533333   | 0.6        | 6.136       | 4.209333   | 2.052716         | 2.003938       | 0.876364       | 0.152604        | 5.9883240.4730350.9947868.2360491.20333354.27667         | 24                       | 760.333333                       | 6.99        |             |             |             |                  |           |
|       | ASV               | 0.45          | 0.466667      | 0.316667   | 0.486667   | 4.104667    | 2.999167   | 1.310267         | 1.075337       | 0.517955       | 0.502126        | 2.5704740.3211770.38554312.881121.286667                 | 51.49                    | 17.33333                         | 698.333333  | 7.17        |             |             |                  |           |
|       | MWLS              | 0.616667      | 0.633333      | 0.416667   | 0.593333   | 3.114963    | 2.523      | 2.174054         | 2.109609       | 0.88785        | 0.145571        | 3.9223620.2527550.626903                                 | 15.0789                  | 1.096667                         | 57.78       | 47.9        | 579.6666667 | 6.916666667 |                  |           |
| SB    | HG                | 0.583333      | 0.266667      | 0.316667   | 0.853333   | 3.193667    | 3.366667   | 3.471879         | 2.304667       | 0.799287       | 0.138071        | 2.7624020.2058060.60928728.307661.116667                 | 57.17                    | 24.66667                         | 985.333333  | 6.46        |             |             |                  |           |
|       | ASV               | 0.4           | 0.05          | 0.55       | 0.74       | 2.042       | 1.974667   | 1.551854         | 1.668428       | 0.645389       | 0.335831        | 2.7539260.1425230.65581318.66124                         | 1.18                     | 54.9433323.66667                 | 1033        | 5.22        |             |             |                  |           |
|       | MWLS              | 0.483333      | 0             | 0.35       | 0.57       | 2.682667    | 2.967667   | 1.998004         | 1.40521        | 0.630972       | 0.311398        | 2.6645060.2082060.80653537.246181.16333355.5966731.66667 | 1037                     | 6.023333333                      |             |             |             |             |                  |           |

**Table S6.** Evaluation index standard grading.

| Indicator Level | Grade Criteria |                 |                 |                 |                       | Reference basis                                    |
|-----------------|----------------|-----------------|-----------------|-----------------|-----------------------|----------------------------------------------------|
|                 | I              | II              | III             | IV              | V                     |                                                    |
| U <sub>11</sub> | 0~0.234        | 0.234~<br>0.475 | 0.475~<br>0.517 | 0.517~<br>0.758 | 0.758<br>~<br>1.000   | Spatial structure<br>parameters of<br>forest stand |
| U <sub>12</sub> | 0.75~1         | 0.5~0.75        | 0.25~0.5        | 0~0.25          | 0                     | Spatial structure<br>parameters of<br>forest stand |
| U <sub>13</sub> | 0.8~1          | 0.6~0.8         | 0.4~0.6         | 0.2~0.4         | 0~0.2                 | Spatial structure<br>parameters of<br>forest stand |
| U <sub>14</sub> | 0~0.2          | 0.2~0.4         | 0.4~0.6         | 0.6~0.8         | 0.8~1                 | Modern forest<br>determination<br>methods          |
| U <sub>15</sub> | 5.91~6.99      | 4.84~5.91       | 3.76~4.84       | 2.69~3.76       | 1.61~<br>2.69         | Field Type                                         |
| U <sub>16</sub> | 4.11~4.71      | 3.51~4.11       | 2.9~3.51        | 2.30~2.90       | 1.70~<br>2.30         | Field Type                                         |
| U <sub>21</sub> | 3.70~4.38      | 3.02~3.70       | 2.35~3.02       | 1.67~2.35       | 0.99~<br>1.67         | Field Type                                         |
| U <sub>22</sub> | 2.39~2.75      | 2.03~2.39       | 1.67~2.03       | 1.31~1.67       | 0.95~<br>1.31         | Field Type                                         |
| U <sub>23</sub> | 0.85~0.95      | 0.75~0.85       | 0.66~0.75       | 0.56~0.66       | 0.47~<br>0.56         | Field Type                                         |
| U <sub>24</sub> | 0.08~0.17      | 0.17~0.27       | 0.27~0.36       | 0.36~0.45       | 0.45~<br>0.54         | Field Type                                         |
| U <sub>31</sub> | >4             | 3~4             | 2~3             | 1~2             | 0.6~1                 | National Soil<br>Census Office<br>China Soil       |
| U <sub>32</sub> | 0.41~0.49      | 0.34~0.41       | 0.27~0.34       | 0.20~0.27       | 0.13~<br>2.0          | Field Type                                         |
| U <sub>33</sub> | 1.05~1.23      | 0.87~1.05       | 0.69~0.87       | 0.50~0.69       | 0.32~<br>0.50         | Field Type                                         |
| U <sub>34</sub> | 37.52~46.03    | 29.02~<br>37.52 | 20.51~<br>29.02 | 12.01~<br>20.51 | 3.50~<br>12.01        | Field Type                                         |
| U <sub>35</sub> | 1~1.25         | 1.25~1.35       | 1.35~1.45       | 1.45~1.55       | >1.55                 | National Soil<br>Census Office<br>China Soil       |
| U <sub>36</sub> | 55~65          | 45~55           | 35~45           | 25~35           | 15~25                 | National Soil<br>Census Office<br>China Soil       |
| U <sub>37</sub> | 6.97~7.43      | 6.51~6.97       | 6.04~6.51       | 5.58~6.04       | 5.15~<br>5.58         | Field Type                                         |
| U <sub>41</sub> | <10            | 10~20           | 20~30           | 30~40           | >40                   | Field Type                                         |
| U <sub>42</sub> | 526~823        | 823~1085        | 1085~<br>1346   | 1346~1607       | 1607~<br>1869         | Field Type                                         |
| U <sub>43</sub> | 0~0.120        | 0.120~<br>0.239 | 0.239~<br>0.359 | 0.339~<br>0.478 | 0.478<br>~<br>0.5.978 | Field Type                                         |

**Table S7.** Plants composition and importance values in AFS.

| Agroforestry           | Area | English name             | Latin Name                                            | Type   | IV    | English name               | Latin Name                                             | Type   | IV    |
|------------------------|------|--------------------------|-------------------------------------------------------|--------|-------|----------------------------|--------------------------------------------------------|--------|-------|
| Homegarden (HG)        | BJ   | Walnut                   | <i>Juglans regia</i> L.                               | Arbo r | 0.482 | Erigeron canadensis        | <i>Conyza canadensis</i> (L.) Cronq.                   | Herbal | 0.111 |
|                        |      | Rosa roxburghii trat     | <i>Rosa roxburghii</i> Tratt.                         | Shrub  | 0.423 | Artemisia                  | <i>Artemisia argyi</i> H. Lév. & Vaniot                | Herbal | 0.105 |
|                        |      | Moss                     | <i>Bryophyta</i>                                      | Herbal | 0.207 | Glandular stalk St         | <i>Herba Siegesbeckiae</i> Orientalis                  | Herbal | 0.101 |
|                        |      | Green bristlegrass       | <i>Setaria viridis</i> (L.) Beauv.                    | Herbal | 0.194 | Berseem Clover             | <i>Galium odoratum</i> (L.) Scop.                      | Herbal | 0.089 |
|                        |      | Herb of Hispid Arthraxon | <i>Arthraxon hispidus</i> (Trin.) Makino              | Herbal | 0.122 | Galinsoga parviflora       | <i>Galinsoga parviflora</i> Cav.                       | Herbal | 0.085 |
|                        |      | The Bidens bipinnata     | <i>Bidens pilosa</i> L.                               | Herbal | 0.387 | Fructus amomi              | <i>Amomum villosum</i> Lour.                           | Herbal | 0.158 |
|                        |      | Evodia rutaecarpa        | <i>Tetradium rutilcarpum</i> (A. Juss.) T. G. Hartley | Arbo r | 0.369 | Leek                       | <i>Allium tuberosum</i> Rottler ex Spreng.             | Herbal | 0.116 |
|                        | HJ   | Walnut                   | <i>Juglans regia</i> L.                               | Arbo r | 0.303 | Honeysuckle                | <i>Lonicera Japonica</i> Thunb.                        | Herbal | 0.11  |
|                        |      | Chinese Prickly Ash      | <i>Zanthoxylum simulans</i> Hance                     | Arbo r | 0.272 | Paper Mulberry             | <i>Broussonetia papyrifera</i> (Linn.) L'Hér. ex Vent. | Arbor  | 0.107 |
|                        |      | Deutzia                  | <i>Deutzia setchuenensis</i> Franch.                  | Shrub  | 0.167 | Camphor                    | <i>Cinnamomum camphora</i> (L.) Presl.                 | Arbor  | 0.101 |
|                        |      | Cyperus rotundus         | <i>Cyperus rotundus</i> Linn.                         | Herbal | 0.263 | Garland chrysanthemum      | <i>Crassocephalum crepidioides</i> (Benth.) S. Moore   | Herbal | 0.137 |
|                        |      | Peach                    | <i>Amygdalus persica</i> L.                           | Shrub  | 0.235 | Berseem Clover             | <i>Galium odoratum</i> (L.) Scop.                      | Herbal | 0.133 |
|                        |      | Plantago Herb            | <i>Plantaginis</i> Herba                              | Herbal | 0.206 | Plum                       | <i>Prunus salicina</i> Lindl.                          | Arbor  | 0.102 |
|                        |      | Cherry                   | <i>Prunus pseudocerasus</i> Lindl.                    | Shrub  | 0.191 | Corn                       | <i>Zea mays</i> L.                                     | Herbal | 0.1   |
|                        |      | Flue-cured tobacco       | <i>Nicotiana tabacum</i> L.                           | Herbal | 0.151 | Lysimachia                 | <i>Lysimachia patungensis</i> Hand.-Mazz.              | Herbal | 0.09  |
| Agrisilviculture (ASV) | BJ   | Rosa roxburghii trat     | <i>Rosa roxburghii</i> Tratt.                         | Shrub  | 0.691 | Axillary Southern Wildjube | <i>Rubus coreanus</i> Miq.                             | Herbal | 0.149 |
|                        |      | Walnut                   | <i>Juglans regia</i> L.                               | Arbo r | 0.388 | Herb of Hispid Arthraxon   | <i>Arthraxon hispidus</i> (Thunb.) Makino              | Herbal | 0.149 |

|                              |    |                                    |                                                     |          |        |                             |                                                          |        |       |
|------------------------------|----|------------------------------------|-----------------------------------------------------|----------|--------|-----------------------------|----------------------------------------------------------|--------|-------|
| Multipurpose woodlots (MWLs) | HJ | Artemisia                          | <i>Artemisia argyi</i> H. Lév. & Vaniot             | Herb al  | 0.37 1 | Erigeron canadensis         | <i>Conyza canadensis</i> (L.) Cronq.                     | Herbal | 0.134 |
|                              |    | Sang                               | <i>Morus alba</i> L.                                | Shrub    | 0.31 7 | Wilford's Cranesbill        | <i>Geranium wilfordii</i> Maxim.                         | Herbal | 0.12  |
|                              |    | Ryegrass                           | <i>Lolium perenne</i> L.                            | Herb al  | 0.27 2 | Ryuki                       | <i>Solanum nigrum</i> L.                                 | Herbal | 0.115 |
|                              |    | Pitaya                             | <i>Hylocereus</i> (A. Berger) Britton & Rose        | Shrub    | 0.65 3 | The Bidens bipinnata        | <i>Bidens pilosa</i> L.                                  | Herbal | 0.13  |
|                              |    | Chinese Prickly Ash                | <i>Zanthoxylum simulans</i> Hance                   | Arboreal | 0.39 3 | Erigeron canadensis         | <i>Conyza canadensis</i> (L.) Cronq.                     | Herbal | 0.114 |
|                              |    | Mexican fire plant                 | <i>Euphorbia cyathophora</i> Murr.                  | Herb al  | 0.27   | Ageratum conyzoides         | <i>Ageratum conyzoides</i> L.                            | Herbal | 0.086 |
|                              |    | Erigeron canadensis                | <i>Conyza canadensis</i> (L.) Cronq.                | Herb al  | 0.17 4 | June cry                    | <i>Pinellia ternata</i> (Thunb.) Makino                  | Herbal | 0.082 |
|                              |    | Herb of Hispid Arthraxon           | <i>Arthraxon hispidus</i> (Thunb.) Makino           | Herb al  | 0.17 1 | field sow thistle           | <i>Ixeris polycephala</i> Cass.                          | Herbal | 0.062 |
|                              |    | Pear                               | <i>Pyrus</i> spp                                    | Arboreal | 0.45 9 | Goosegrasses Herb           | <i>Eleusine indica</i> (L.) Gaertn.                      | Herbal | 0.119 |
|                              |    | Echinochloa crusgalli (L.) Beauv.] | <i>Echinochloa crusgalli</i> (L.) P. Beauv.         | Herb al  | 0.36 8 | Herb of Hispid Arthraxon    | <i>Arthraxon hispidus</i> (Thunb.) Makino                | Herbal | 0.113 |
|                              |    | Bletilla striata                   | <i>Bletilla striata</i> (Thunb. ex Murray) Rchb. F. | Herb al  | 0.26 5 | Indian Mock strawberry Herb | <i>Duchesnea indica</i> (Andr.) Focke                    | Herbal | 0.084 |
|                              |    | Herb of Common Crabgrass           | <i>Digitaria sanguinalis</i> (L.) Scop.             | Herb al  | 0.15 6 | Portulacaria afra           | <i>Portulacaria afra</i> Jacq.                           | Herbal | 0.078 |
|                              |    | Green bristlegrass                 | <i>Setaria viridis</i> (L.) Beauv.                  | Herb al  | 0.15   | Calamint                    | <i>Clinopodium chinense</i> (Benth.) Kuntze              | Herbal | 0.064 |
|                              |    | Rosa roxburghii trat               | <i>Rosa roxburghii</i> Tratt.                       | Shrub    | 0.29 6 | Oplismenus undulatifolius   | <i>Oplismenus undulatifolius</i> (Ard.) Roemer & Schuit. | Herbal | 0.115 |
| Multipurpose woodlots (MWLs) | BJ | Walnut                             | <i>Juglans regia</i> L.                             | Arboreal | 0.41 2 | Cat's Claw Fern             | <i>Onychium japonicum</i> (Thunb.) Kunze                 | Herbal | 0.115 |
|                              |    | Commelinace Herba                  | <i>Commelina communis</i> L.                        | Herb al  | 0.18   | Indian Mock strawberry Herb | <i>Duchesnea indica</i> (Andr.) Focke                    | Herbal | 0.112 |
|                              |    | Rubus setchuenensis                | <i>Rubus setchuenensis</i> Bureau & Franch.         | Herb al  | 0.12 4 | Berseem Clover              | <i>Galium odoratum</i> (L.) Scop.                        | Herbal | 0.107 |
|                              |    | Creeping oxalis                    | <i>Oxalis corniculata</i> L.                        | Herb al  | 0.11 8 | Pteris ensiformis Burm      | <i>Pteris ensiformis</i> Burm.f.                         | Herbal | 0.104 |

|    |  |                                      |                                                                  |                   |                                 |                                                                         |        |       |
|----|--|--------------------------------------|------------------------------------------------------------------|-------------------|---------------------------------|-------------------------------------------------------------------------|--------|-------|
|    |  | sorghum                              | <i>Sorghum bicolor</i><br>(L.) Moench                            | Herb 0.48<br>al 7 | Rough<br>Melic                  | <i>ogonatherum<br/>crinitum</i><br>(Thunb.)<br>Kunth.                   | Herbal | 0.19  |
|    |  | Chinese Prickly<br>Ash               | <i>Zanthoxylum<br/>simulans</i> Hance                            | Arbo 0.47<br>r 1  | Ageratum<br>conyzoides          | <i>Ageratum<br/>conyzoides</i> L.                                       | Herbal | 0.168 |
| HJ |  | Pitaya                               | <i>Hylocereus<br/>undulatus</i> (A.<br>Berger) Britton &<br>Rose | Shru 0.30<br>b 4  | Persimmon                       | <i>Diospyros kaki</i><br>Thunb.                                         | Shrub  | 0.162 |
|    |  | Pear                                 | <i>Pyrus</i> spp                                                 | Arbo 0.21<br>r 4  | Perilla<br>frutescens<br>crispa | <i>Perilla<br/>frutescens</i><br>(L.)Britt.(Ocim<br>um frutescens<br>L. | Shrub  | 0.152 |
|    |  | Plum                                 | <i>Prunus salicina</i><br>Lindl.                                 | Shru 0.21<br>b 2  | Mango                           | <i>Mangifera<br/>indica</i> L.                                          | Shrub  | 0.133 |
|    |  | Manyflower<br>Solomonseal<br>Rhizome | <i>Polygonatum<br/>sibiricum</i> Delar. Ex<br>Redoute            | Herb 0.81<br>al   | Herb of<br>Hispid<br>Arthraxon  | <i>Arthraxon<br/>hispidus</i><br>(Thunb.)<br>Makino                     | Herbal | 0.13  |
|    |  | Walnut                               | <i>Juglans regia</i> L.                                          | Arbo 0.44<br>r 2  | Aquatic<br>Malachium            | <i>Myosoton<br/>aquaticum</i> (L.)<br>Moench                            | Herbal | 0.105 |
| SB |  | Pear                                 | <i>Pyrus</i> spp                                                 | Arbo 0.29<br>r 7  | Annual<br>Fleabane              | <i>Erigeron<br/>annuus</i> (L.)<br>Desf                                 | Herbal | 0.102 |
|    |  | Peach                                | <i>Amygdalus persica</i><br>L.                                   | Shru 0.22<br>b 2  | Erigeron<br>canadensis          | <i>Conyza<br/>canadensis</i> (L.)<br>Cronq.                             | Herbal | 0.084 |
|    |  | Brittle<br>Falsepimpernel<br>Herb    | <i>Lindernia crustacea</i><br>(L.) F. Muell                      | Herb 0.17<br>al 1 | Amaranthu<br>s                  | <i>Amaranthus<br/>hypochondriac<br/>us</i> L.                           | Herbal | 0.077 |

Note: Only the number of plant species with the top ten importance values are shown in the table.

**Table S8.** Changes in ecosystem plant composition.

| Structure          | Area | Total<br>species | Total<br>number<br>of genera | Subject         | Number<br>of<br>genera | Of the total<br>number of<br>genera/% | Number<br>of<br>species | Of the total<br>number of<br>species/% |
|--------------------|------|------------------|------------------------------|-----------------|------------------------|---------------------------------------|-------------------------|----------------------------------------|
| Homegarden<br>(HG) | BJ   | 29               | 29                           | Asteraceae      | 9                      | 31.03                                 | 9                       | 21.95                                  |
|                    |      |                  |                              | Graminaceae     | 4                      | 13.79                                 | 4                       | 9.76                                   |
|                    |      |                  |                              | Labiatae        | 2                      | 6.9                                   | 2                       | 4.88                                   |
|                    |      |                  |                              | Caryophyllaceae | 2                      | 6.9                                   | 2                       | 4.88                                   |
|                    |      |                  |                              | Polygonaceae    | 2                      | 6.9                                   | 2                       | 4.88                                   |
|                    |      |                  |                              | Urticaceae      | 2                      | 6.9                                   | 2                       | 4.88                                   |
|                    |      |                  |                              | Liliaceae       | 1                      | 3.45                                  | 1                       | 2.44                                   |
|                    | HJ   | 19               | 17                           | Sanko           | 2                      | 11.76                                 | 2                       | 10.53                                  |
|                    |      |                  |                              | Leguminosae     | 2                      | 11.76                                 | 2                       | 10.53                                  |
|                    |      |                  |                              |                 |                        |                                       |                         |                                        |



|                                    |    |    |    |                 |   |       |   |       |
|------------------------------------|----|----|----|-----------------|---|-------|---|-------|
| Agrisilviculture<br>(ASV)          | SB | 43 | 42 | Jiang Ke        | 1 | 5.88  | 1 | 5.26  |
|                                    |    |    |    | Asteraceae      | 7 | 16.67 | 7 | 16.28 |
|                                    |    |    |    | Labiatae        | 4 | 9.52  | 4 | 9.3   |
|                                    |    |    |    | Solanaceae      | 4 | 9.52  | 4 | 9.3   |
|                                    |    |    |    | Graminaceae     | 3 | 7.14  | 3 | 6.98  |
|                                    |    |    |    | Rosaceae        | 2 | 4.76  | 2 | 4.65  |
|                                    |    |    |    | Primulaceae     | 2 | 4.76  | 2 | 4.65  |
|                                    |    |    |    | Liliaceae       | 2 | 4.76  | 2 | 4.65  |
|                                    |    |    |    | Polygonaceae    | 2 | 4.76  | 2 | 4.65  |
|                                    |    |    |    | Jiang Ke        | 1 | 2.38  | 1 | 2.33  |
|                                    | BJ | 27 | 27 | Asteraceae      | 5 | 18.52 | 6 | 16.22 |
|                                    |    |    |    | Graminaceae     | 4 | 14.81 | 5 | 13.51 |
|                                    |    |    |    | Rosaceae        | 3 | 11.11 | 4 | 10.81 |
|                                    |    |    |    | Labiatae        | 3 | 11.11 | 3 | 8.11  |
|                                    |    |    |    | Leguminosae     | 1 | 3.7   | 1 | 2.7   |
|                                    |    |    |    | Asteraceae      | 5 | 38.46 | 5 | 35.71 |
|                                    |    |    |    | Leguminosae     | 1 | 7.69  | 1 | 7.14  |
|                                    |    |    |    | Graminaceae     | 4 | 19.05 | 4 | 19.05 |
|                                    |    |    |    | Labiatae        | 2 | 9.52  | 2 | 9.52  |
|                                    |    |    |    | Asteraceae      | 2 | 9.52  | 2 | 9.52  |
| Multipurpose<br>woodlots<br>(MWLs) | HJ | 14 | 13 | Rosaceae        | 1 | 4.76  | 1 | 4.76  |
|                                    |    |    |    | Asteraceae      | 7 | 33.33 | 8 | 26.67 |
|                                    |    |    |    | Graminaceae     | 4 | 19.05 | 4 | 13.33 |
|                                    |    |    |    | Leguminosae     | 2 | 9.52  | 2 | 6.67  |
|                                    |    |    |    | Labiatae        | 1 | 4.76  | 1 | 3.33  |
|                                    |    |    |    | Graminaceae     | 2 | 16.67 | 2 | 14.29 |
|                                    |    |    |    | Asteraceae      | 2 | 16.67 | 2 | 14.29 |
|                                    |    |    |    | Rutaceae        | 1 | 8.33  | 1 | 7.14  |
|                                    |    |    |    | Asteraceae      | 5 | 22.73 | 5 | 15.63 |
|                                    |    |    |    | Graminaceae     | 4 | 18.18 | 4 | 12.5  |
|                                    | SB | 32 | 22 | Amaranthaceae   | 2 | 9.09  | 3 | 9.38  |
|                                    |    |    |    | Xanthaceae      | 2 | 9.09  | 2 | 6.25  |
|                                    |    |    |    | Caryophyllaceae | 1 | 4.55  | 1 | 3.13  |

**Table S9.** AFS species diversity index .

| Structure type     | Area | type   | <i>H</i> | <i>E</i> | <i>C</i> | <i>D</i> |
|--------------------|------|--------|----------|----------|----------|----------|
| Homegarden<br>(HG) | BJ   | Woody  | 0.75     | 0.65     | 0.59     | 0.64     |
|                    |      | Herbal | 2.4      | 0.83     | 0.13     | 3.48     |
|                    | HJ   | Woody  | 0.9      | 0.94     | 0.42     | 0.46     |
|                    |      | Herbal | 2        | 0.88     | 0.15     | 2.05     |
|                    | SB   | Woody  | 0.41     | 0.42     | 0.76     | 0.37     |
|                    |      | Herbal | 2.3      | 0.8      | 0.14     | 3.47     |
| Agrisilviculture   | BJ   | Woody  | 0.65     | 0.94     | 0.53     | 0.21     |

|                                                                              |    |        |      |      |      |      |
|------------------------------------------------------------------------------|----|--------|------|------|------|------|
| (ASV)<br><br><br><br><br><br><br><br><br><br>Multipurpose<br>woodlots (MWLs) | HJ | Herbal | 2.22 | 0.77 | 0.16 | 2.99 |
|                                                                              |    | Woody  | 0.35 | 0.5  | 0.79 | 0.19 |
|                                                                              | SB | Herbal | 1.08 | 0.52 | 0.5  | 1.31 |
|                                                                              |    | Woody  | 0.03 | 0.05 | 0.99 | 0.19 |
|                                                                              | BJ | Herbal | 1.3  | 0.59 | 0.39 | 1.29 |
|                                                                              |    | Woody  | 0.42 | 0.6  | 0.7  | 0.27 |
|                                                                              | HJ | Herbal | 1.93 | 0.76 | 0.24 | 2.53 |
|                                                                              |    | Woody  | 0.84 | 0.78 | 0.5  | 0.63 |
|                                                                              |    | Herbal | 2.11 | 0.89 | 0.15 | 2.17 |
|                                                                              |    | Woody  | 0.05 | 0.07 | 0.98 | 0.21 |
|                                                                              | SB | Woody  | 0.05 | 0.07 | 0.98 | 0.21 |
|                                                                              |    | Herbal | 1.57 | 0.61 | 0.31 | 2.11 |

Note: "H" refers to Shannon's diversity index; "E" Pielou's evenness index; "C" Simpson's dominance index; "D" Margalef's richness index.
